# Supplementary material for: Sour cherry extract inhibits human salivary α-amylase and growth ofStreptococcus mutans(a pilot clinical study)
Source: Royal Society of Chemistry journal article supplement (doi:10.1039/c8fo00064f), 2018-01-01
Supplement: c8fo00064f1.pdf [file c8fo00064f1.pdf]

**Sour Cherry extract inhibits Human Salivary  $\alpha$ -Amylase and growth of *Streptococcus mutans* (a pilot clinical study)**

Food and Function

**Judit Homoki<sup>a</sup>, Gyöngyi Gyémánt<sup>b</sup>, Péter Balogh<sup>c</sup>, László Stündl<sup>a</sup>, Piroska Bíró-Molnár<sup>a</sup>  
Melinda Paholcsek<sup>d</sup>, Judit Váradi<sup>e</sup>, Ferenc Fenyvesi<sup>e</sup>, Barna Kelentey<sup>f</sup>, Judit Nemes<sup>g</sup>,  
Judit Remenyik<sup>a\*</sup>**

*Corresponding author:* Judit Remenyik, University of Debrecen, Institute of Food  
Technology, P.O. Box 36, Böszörményi út 138., Debrecen H-4032, Hungary.

*E-mail address:* [remenyik@agr.unideb.hu](mailto:remenyik@agr.unideb.hu) (J. Remenyik),

Phone: 0036 52 518 600/68298

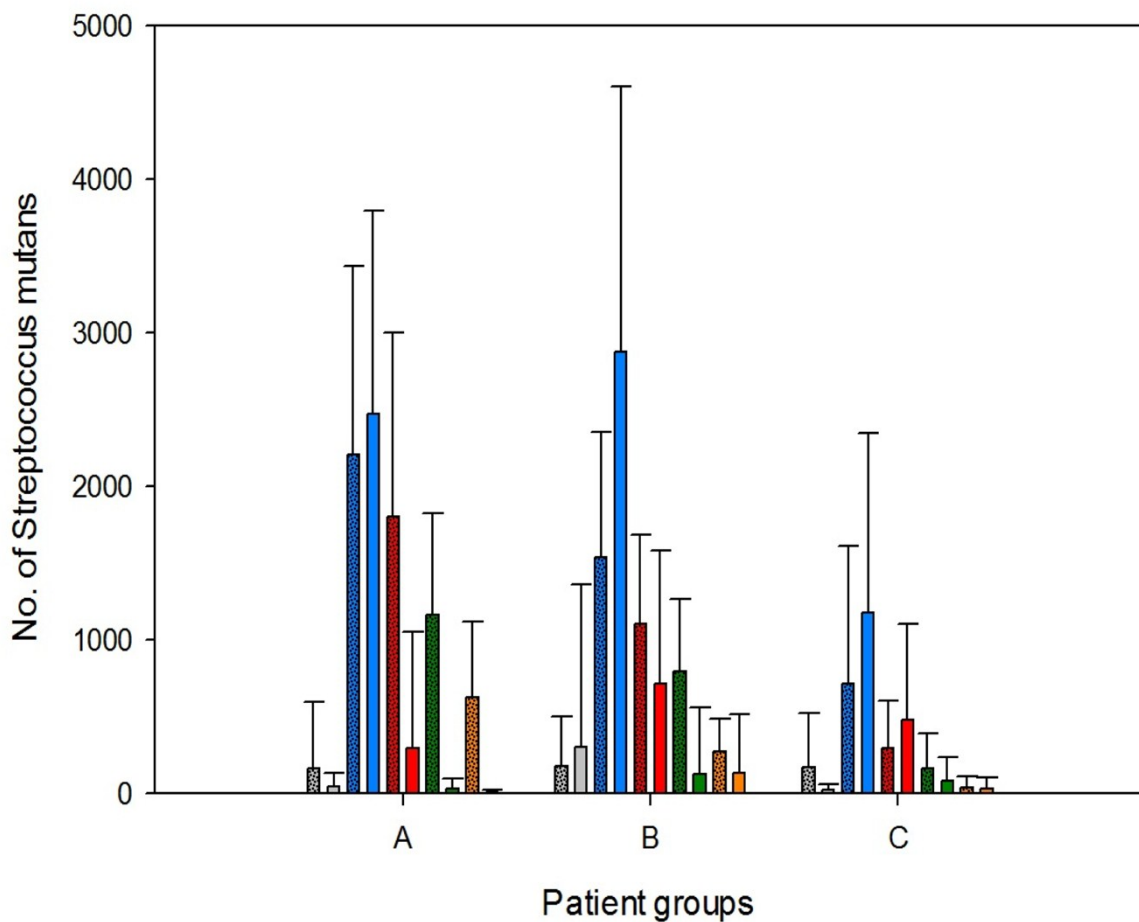

**Figure S1.** Representation of the number of hemolizing *Streptococcus mutans* stains with ( $\pm$ SD) observed on blood agar plates in different patient groups (A: over 30 years of age, B: 18 to 20 years, C: 12 years old). Coloured-dotted graphs refer to control, while coloured-hollow graphs refer to control data groups. Colors represent different sampling procedures (grey: 0. time point prior mastification, blue: sampling right after mastification, red: 10 minutes following mastification, red: 20 minutes after mastification, orange: 30 minutes after mastification).

**Table S1:** representation the median values with ( $\pm$ SD) of the different data groups. Results of the T-tests are shown where empty squares show no significance and squares filled with  $\checkmark$  signs refer to significant differences between the two data groups. List of abbreviations: AK (control group-A: over 30 years of age), AE (case group-A: over 30 years of age), BK (control group-B: 18 to 20 years), BE (case group-B: 18 to 20 years), CK (control group-C: 12 years old), CE (case group-C: 12 years old). Numbers 1, 2, 3, 4, 5 refer to sampling procedures (1: 0. time point prior mastification, 2: sampling right after mastification, 3: 10 minutes following mastification, 4: 20 minutes after mastification, 5: 30 minutes after mastification).

|          | media<br>n | ±SD    | 01<br>AK | 01<br>AE | 01<br>BK | 01<br>BE | 01<br>CK | 01<br>CE | 12<br>AK | 12<br>AE | 12<br>BK | 12<br>BE | 12<br>CK | 12<br>CE | 23<br>AK | 23<br>AE | 23<br>BK | 23<br>BE | 23<br>CK | 23<br>CE | 34<br>AK | 34<br>AE | 34<br>BK | 34<br>BE | 34<br>CK | 34<br>CE | 45<br>AK | 45<br>AE | 45<br>BK | 45<br>BE | 45<br>CK | 45<br>CE |   |   |
|----------|------------|--------|----------|----------|----------|----------|----------|----------|----------|----------|----------|----------|----------|----------|----------|----------|----------|----------|----------|----------|----------|----------|----------|----------|----------|----------|----------|----------|----------|----------|----------|----------|---|---|
| 0<br>1AK | 162.8      | 434.8  | -        |          |          |          |          |          | ✓        | ✓        | ✓        | ✓        | ✓        | ✓        | ✓        |          | ✓        | ✓        |          |          | ✓        |          | ✓        |          |          |          | ✓        |          |          |          |          |          |   |   |
| 0<br>1AE | 43.2       | 94.3   |          | -        |          |          |          |          | ✓        | ✓        | ✓        | ✓        | ✓        | ✓        | ✓        |          | ✓        | ✓        | ✓        | ✓        | ✓        |          | ✓        |          |          |          | ✓        |          | ✓        |          |          |          |   |   |
| 0<br>1BK | 181.8      | 316.5  | ✓        | ✓        | -        | ✓        | ✓        | ✓        |          | ✓        |          | ✓        | ✓        |          |          | ✓        |          | ✓        | ✓        |          |          | ✓        | ✓        | ✓        | ✓        | ✓        | ✓        | ✓        | ✓        | ✓        | ✓        | ✓        | ✓ |   |
| 0<br>1BE | 302.9      | 1054.8 |          |          |          | -        |          |          | ✓        | ✓        | ✓        | ✓        |          | ✓        | ✓        |          | ✓        |          |          |          | ✓        |          |          |          |          |          |          |          |          |          |          |          |   |   |
| 0<br>1CK | 170.1      | 353.3  |          |          |          |          | -        |          | ✓        | ✓        | ✓        | ✓        | ✓        | ✓        | ✓        |          | ✓        | ✓        |          |          | ✓        |          | ✓        |          |          |          | ✓        |          |          |          |          |          |   |   |
| 0<br>1CE | 26.92      | 37.8   |          |          |          |          |          | -        | ✓        | ✓        | ✓        | ✓        | ✓        | ✓        | ✓        |          | ✓        | ✓        | ✓        | ✓        | ✓        |          | ✓        |          | ✓        |          | ✓        | ✓        | ✓        |          |          |          |   |   |
| 1<br>2AK | 2203.9     | 1228.3 | ✓        | ✓        | ✓        | ✓        | ✓        | ✓        | -        |          |          |          | ✓        | ✓        |          | ✓        | ✓        | ✓        | ✓        | ✓        | ✓        | ✓        | ✓        | ✓        | ✓        | ✓        | ✓        | ✓        | ✓        | ✓        | ✓        | ✓        | ✓ |   |
| 1<br>2AE | 2476.4     | 1322.2 | ✓        | ✓        | ✓        | ✓        | ✓        | ✓        |          | -        | ✓        |          | ✓        | ✓        |          | ✓        | ✓        | ✓        | ✓        | ✓        | ✓        | ✓        | ✓        | ✓        | ✓        | ✓        | ✓        | ✓        | ✓        | ✓        | ✓        | ✓        | ✓ | ✓ |
| 1<br>2BK | 1534.6     | 819.2  | ✓        | ✓        | ✓        | ✓        | ✓        | ✓        |          | ✓        | -        | ✓        | ✓        |          |          | ✓        |          | ✓        | ✓        | ✓        |          | ✓        | ✓        | ✓        | ✓        | ✓        | ✓        | ✓        | ✓        | ✓        | ✓        | ✓        | ✓ | ✓ |
| 1<br>2BE | 2875.6     | 1729.5 | ✓        | ✓        | ✓        | ✓        | ✓        | ✓        |          |          | ✓        | -        | ✓        | ✓        | ✓        | ✓        | ✓        | ✓        | ✓        | ✓        | ✓        | ✓        | ✓        | ✓        | ✓        | ✓        | ✓        | ✓        | ✓        | ✓        | ✓        | ✓        | ✓ | ✓ |
| 1<br>2CK | 716.6      | 892    | ✓        | ✓        | ✓        |          | ✓        | ✓        | ✓        | ✓        | ✓        | ✓        | -        |          | ✓        |          |          |          |          |          |          | ✓        |          | ✓        | ✓        | ✓        |          | ✓        |          | ✓        | ✓        | ✓        | ✓ |   |
| 1<br>2CE | 1178.3     | 1167.9 | ✓        | ✓        | ✓        | ✓        | ✓        | ✓        | ✓        | ✓        |          | ✓        |          | -        | ✓        |          |          |          | ✓        | ✓        |          | ✓        |          | ✓        | ✓        | ✓        | ✓        | ✓        | ✓        | ✓        | ✓        | ✓        | ✓ | ✓ |
| 2<br>3AK | 1804.9     | 1196.2 | ✓        | ✓        | ✓        | ✓        | ✓        | ✓        |          |          |          | ✓        | ✓        |          | -        | ✓        | ✓        | ✓        | ✓        | ✓        |          | ✓        | ✓        | ✓        | ✓        | ✓        | ✓        | ✓        | ✓        | ✓        | ✓        | ✓        | ✓ | ✓ |
| 2<br>3AE | 295.4      | 757.2  |          |          |          |          |          |          | ✓        | ✓        | ✓        | ✓        |          | ✓        | ✓        | -        | ✓        |          |          |          | ✓        |          | ✓        |          |          |          |          |          |          |          |          |          |   |   |
| 2<br>3BK | 1103.1     | 580.6  | ✓        | ✓        | ✓        | ✓        | ✓        | ✓        | ✓        | ✓        |          | ✓        |          |          | ✓        | ✓        | -        |          | ✓        | ✓        |          | ✓        |          | ✓        | ✓        | ✓        |          | ✓        | ✓        | ✓        | ✓        | ✓        | ✓ | ✓ |
| 2<br>3BE | 717.85     | 861    | ✓        | ✓        | ✓        |          | ✓        | ✓        | ✓        | ✓        | ✓        | ✓        |          | ✓        | ✓        |          |          | -        |          |          |          | ✓        |          | ✓        | ✓        | ✓        |          | ✓        | ✓        | ✓        | ✓        | ✓        | ✓ | ✓ |
| 2<br>3CK | 294.6      | 312.9  |          | ✓        |          |          |          | ✓        | ✓        | ✓        | ✓        | ✓        |          | ✓        | ✓        |          | ✓        |          | -        |          | ✓        | ✓        | ✓        |          |          | ✓        | ✓        | ✓        |          |          |          | ✓        | ✓ |   |
| 2<br>3CE | 478.5      | 624    |          | ✓        |          |          |          | ✓        | ✓        | ✓        | ✓        | ✓        |          | ✓        | ✓        |          | ✓        |          |          | -        | ✓        | ✓        |          |          |          | ✓        |          | ✓        |          |          |          | ✓        | ✓ |   |
| 3<br>4AK | 1165.3     | 661.8  | ✓        | ✓        | ✓        | ✓        | ✓        | ✓        | ✓        | ✓        |          | ✓        |          |          | ✓        |          |          |          | ✓        | ✓        | -        | ✓        |          | ✓        | ✓        | ✓        | ✓        | ✓        | ✓        | ✓        | ✓        | ✓        | ✓ | ✓ |
| 3<br>4AE | 28.23      | 73.23  |          |          |          |          |          |          | ✓        | ✓        | ✓        | ✓        | ✓        | ✓        | ✓        |          | ✓        | ✓        | ✓        | ✓        | ✓        | ✓        |          | ✓        |          | ✓        |          | ✓        |          | ✓        |          |          |   |   |
| 3<br>4BK | 794.7      | 468.2  | ✓        | ✓        | ✓        |          | ✓        | ✓        | ✓        | ✓        | ✓        | ✓        |          |          | ✓        | ✓        |          |          | ✓        |          |          | ✓        | -        | ✓        | ✓        | ✓        |          | ✓        | ✓        | ✓        | ✓        | ✓        | ✓ | ✓ |
| 3<br>4BE | 127.5      | 434.4  |          |          |          |          |          |          | ✓        | ✓        | ✓        | ✓        | ✓        | ✓        | ✓        |          | ✓        | ✓        |          |          | ✓        |          | ✓        | -        |          |          | ✓        |          |          |          |          |          |   |   |
| 3<br>4CK | 161.4      | 230.7  |          |          |          |          |          | ✓        | ✓        | ✓        | ✓        | ✓        | ✓        | ✓        | ✓        |          | ✓        | ✓        |          |          | ✓        | ✓        | ✓        |          | -        |          | ✓        | ✓        |          |          |          | ✓        | ✓ |   |
| 3<br>4CE | 79.5       | 160.3  |          |          |          |          |          |          | ✓        | ✓        | ✓        | ✓        | ✓        | ✓        | ✓        |          | ✓        | ✓        | ✓        | ✓        | ✓        |          | ✓        |          |          | -        | ✓        |          | ✓        |          |          |          |   |   |

|                 |       |       |   |   |   |  |   |   |   |   |   |   |   |   |   |   |   |   |   |   |   |   |   |   |   |   |   |   |   |   |   |  |
|-----------------|-------|-------|---|---|---|--|---|---|---|---|---|---|---|---|---|---|---|---|---|---|---|---|---|---|---|---|---|---|---|---|---|--|
| $\frac{4}{5AK}$ | 627.6 | 491.8 | ✓ | ✓ | ✓ |  | ✓ | ✓ | ✓ | ✓ | ✓ | ✓ | ✓ |   |   | ✓ |   | ✓ |   | ✓ | ✓ |   | ✓ | ✓ | ✓ | - | ✓ | ✓ | ✓ | ✓ | ✓ |  |
| $\frac{4}{5AE}$ | 6.4   | 15.2  |   |   | ✓ |  |   | ✓ | ✓ | ✓ | ✓ | ✓ | ✓ | ✓ | ✓ | ✓ | ✓ | ✓ | ✓ | ✓ | ✓ | ✓ | ✓ | ✓ | ✓ | ✓ | - | ✓ | ✓ |   | ✓ |  |
| $\frac{4}{5BK}$ | 277.8 | 207.9 |   | ✓ |   |  |   | ✓ | ✓ | ✓ | ✓ | ✓ |   | ✓ | ✓ |   | ✓ | ✓ |   | ✓ | ✓ | ✓ |   |   | ✓ | ✓ | ✓ | - |   | ✓ | ✓ |  |
| $\frac{4}{5BE}$ | 135.1 | 69.5  |   |   |   |  |   |   | ✓ | ✓ | ✓ | ✓ | ✓ | ✓ | ✓ |   | ✓ | ✓ |   | ✓ |   | ✓ |   |   |   | ✓ |   |   | - |   |   |  |
| $\frac{4}{5CK}$ | 41.2  | 69.5  |   |   |   |  |   |   | ✓ | ✓ | ✓ | ✓ | ✓ | ✓ | ✓ |   | ✓ | ✓ | ✓ | ✓ | ✓ | ✓ |   | ✓ |   | ✓ | ✓ | ✓ |   | - |   |  |
| $\frac{4}{5CE}$ | 35.3  | 67.7  |   |   |   |  |   |   | ✓ | ✓ | ✓ | ✓ | ✓ | ✓ | ✓ |   | ✓ | ✓ | ✓ | ✓ | ✓ | ✓ |   | ✓ |   | ✓ |   | ✓ |   |   | - |  |
